# Supplementary material
Source: publisher figshare collection journal article supplement (https://acs.figshare.com/ndownloader/files/24690551)
Supplement: Supplementary file 1 [file 24690551]

## Supplementary Information

### A Facile and Green Engineering Approach for Enhanced Corrosion Resistance of Ni-Cr-Al<sub>2</sub>O<sub>3</sub> Thermal Spray Coatings

Harpreet Singh Arora<sup>#, \*</sup>, Gopinath Perumal<sup>#</sup>, Manjeet Rani, Harpreet S Grewal

<sup>#</sup>Both authors contributed equally

<sup>1</sup>Surface Science and Tribology Lab, Department of Mechanical Engineering, Shiv Nadar University, Uttar Pradesh, India 201314

\*Corresponding author email: [harpreet.arora@snu.edu.in](mailto:harpreet.arora@snu.edu.in)

**Table S1:** HVOF Spray parameters used for developing Ni-Cr-5Al<sub>2</sub>O<sub>3</sub> coatings on stainless steel (SS316L)

| Parameters                         | Value |
|------------------------------------|-------|
| LPG flow rate (slpm)               | 55-60 |
| Oxygen flow rate (slpm)            | 240   |
| Air pressure (kg/cm <sup>2</sup> ) | 5     |
| Powder feed rate (g/min)           | 45    |
| Spraying distance (mm)             | 152   |
| Particle size Nickel (μm)          | 50-70 |
| Particle size Chromium (μm)        | 60-90 |
| Particle size Alumina (μm)         | 35-60 |

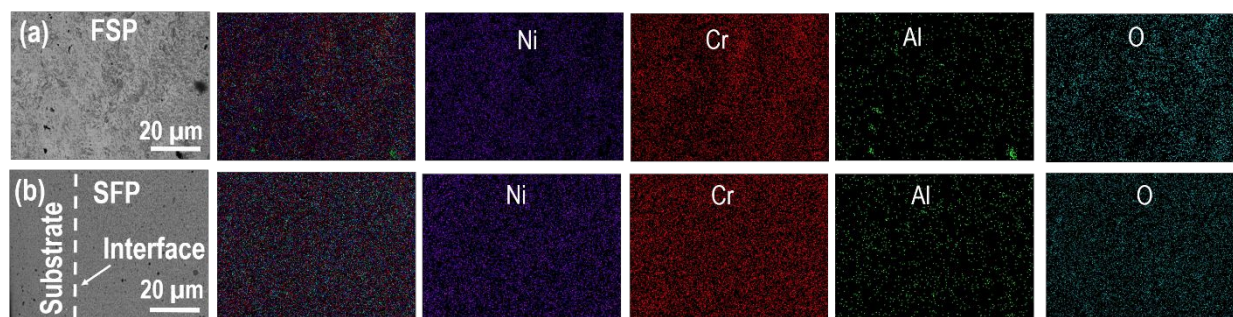

**Figure S1:** EDAX analysis of (a) FSP treated Ni-Cr-5Al<sub>2</sub>O<sub>3</sub> coating and (b) SFP treated Ni-Cr-5Al<sub>2</sub>O<sub>3</sub> coating.

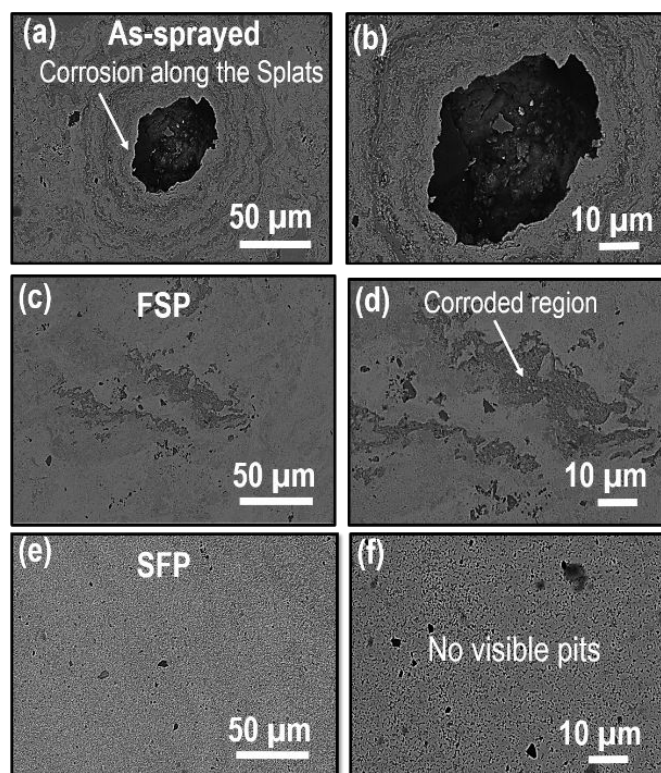

**Figure S2:** SEM images of top surfaces after potentiodynamic polarization testing (a) and (b) as-sprayed Ni-Cr-5Al<sub>2</sub>O<sub>3</sub> coating, (c) and (d) FSP treated Ni-Cr-5Al<sub>2</sub>O<sub>3</sub> coating and (e) and (f) SFP treated Ni-Cr-5Al<sub>2</sub>O<sub>3</sub> coating.

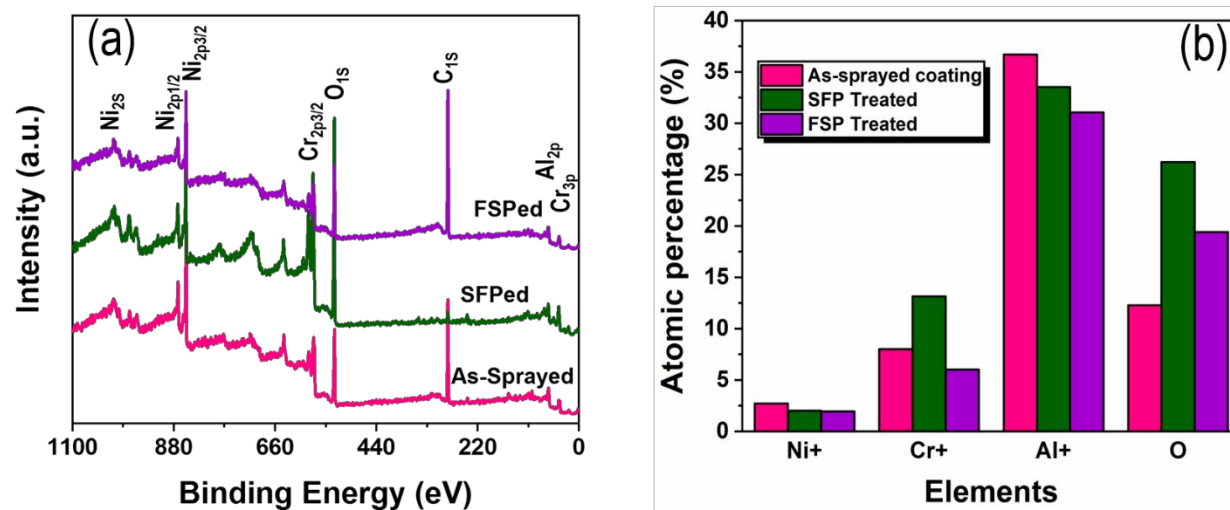

**Figure S3:** (a) XPS survey scan and (b) atomic percentage of different elements in the oxide layer of the as-sprayed, FSP treated and SFP treated Ni-Cr-5Al<sub>2</sub>O<sub>3</sub> coating.
